# Supplementary material
Source: publisher site journal article supplement (https://www.dovepress.com/article/605522)
Supplement: Supplementary file 1 [file 605522%20Supplementary%20Materials.docx]

Figure S1 Learning curve of test AUC with training set sizes ranging from 90 to 230 samples.


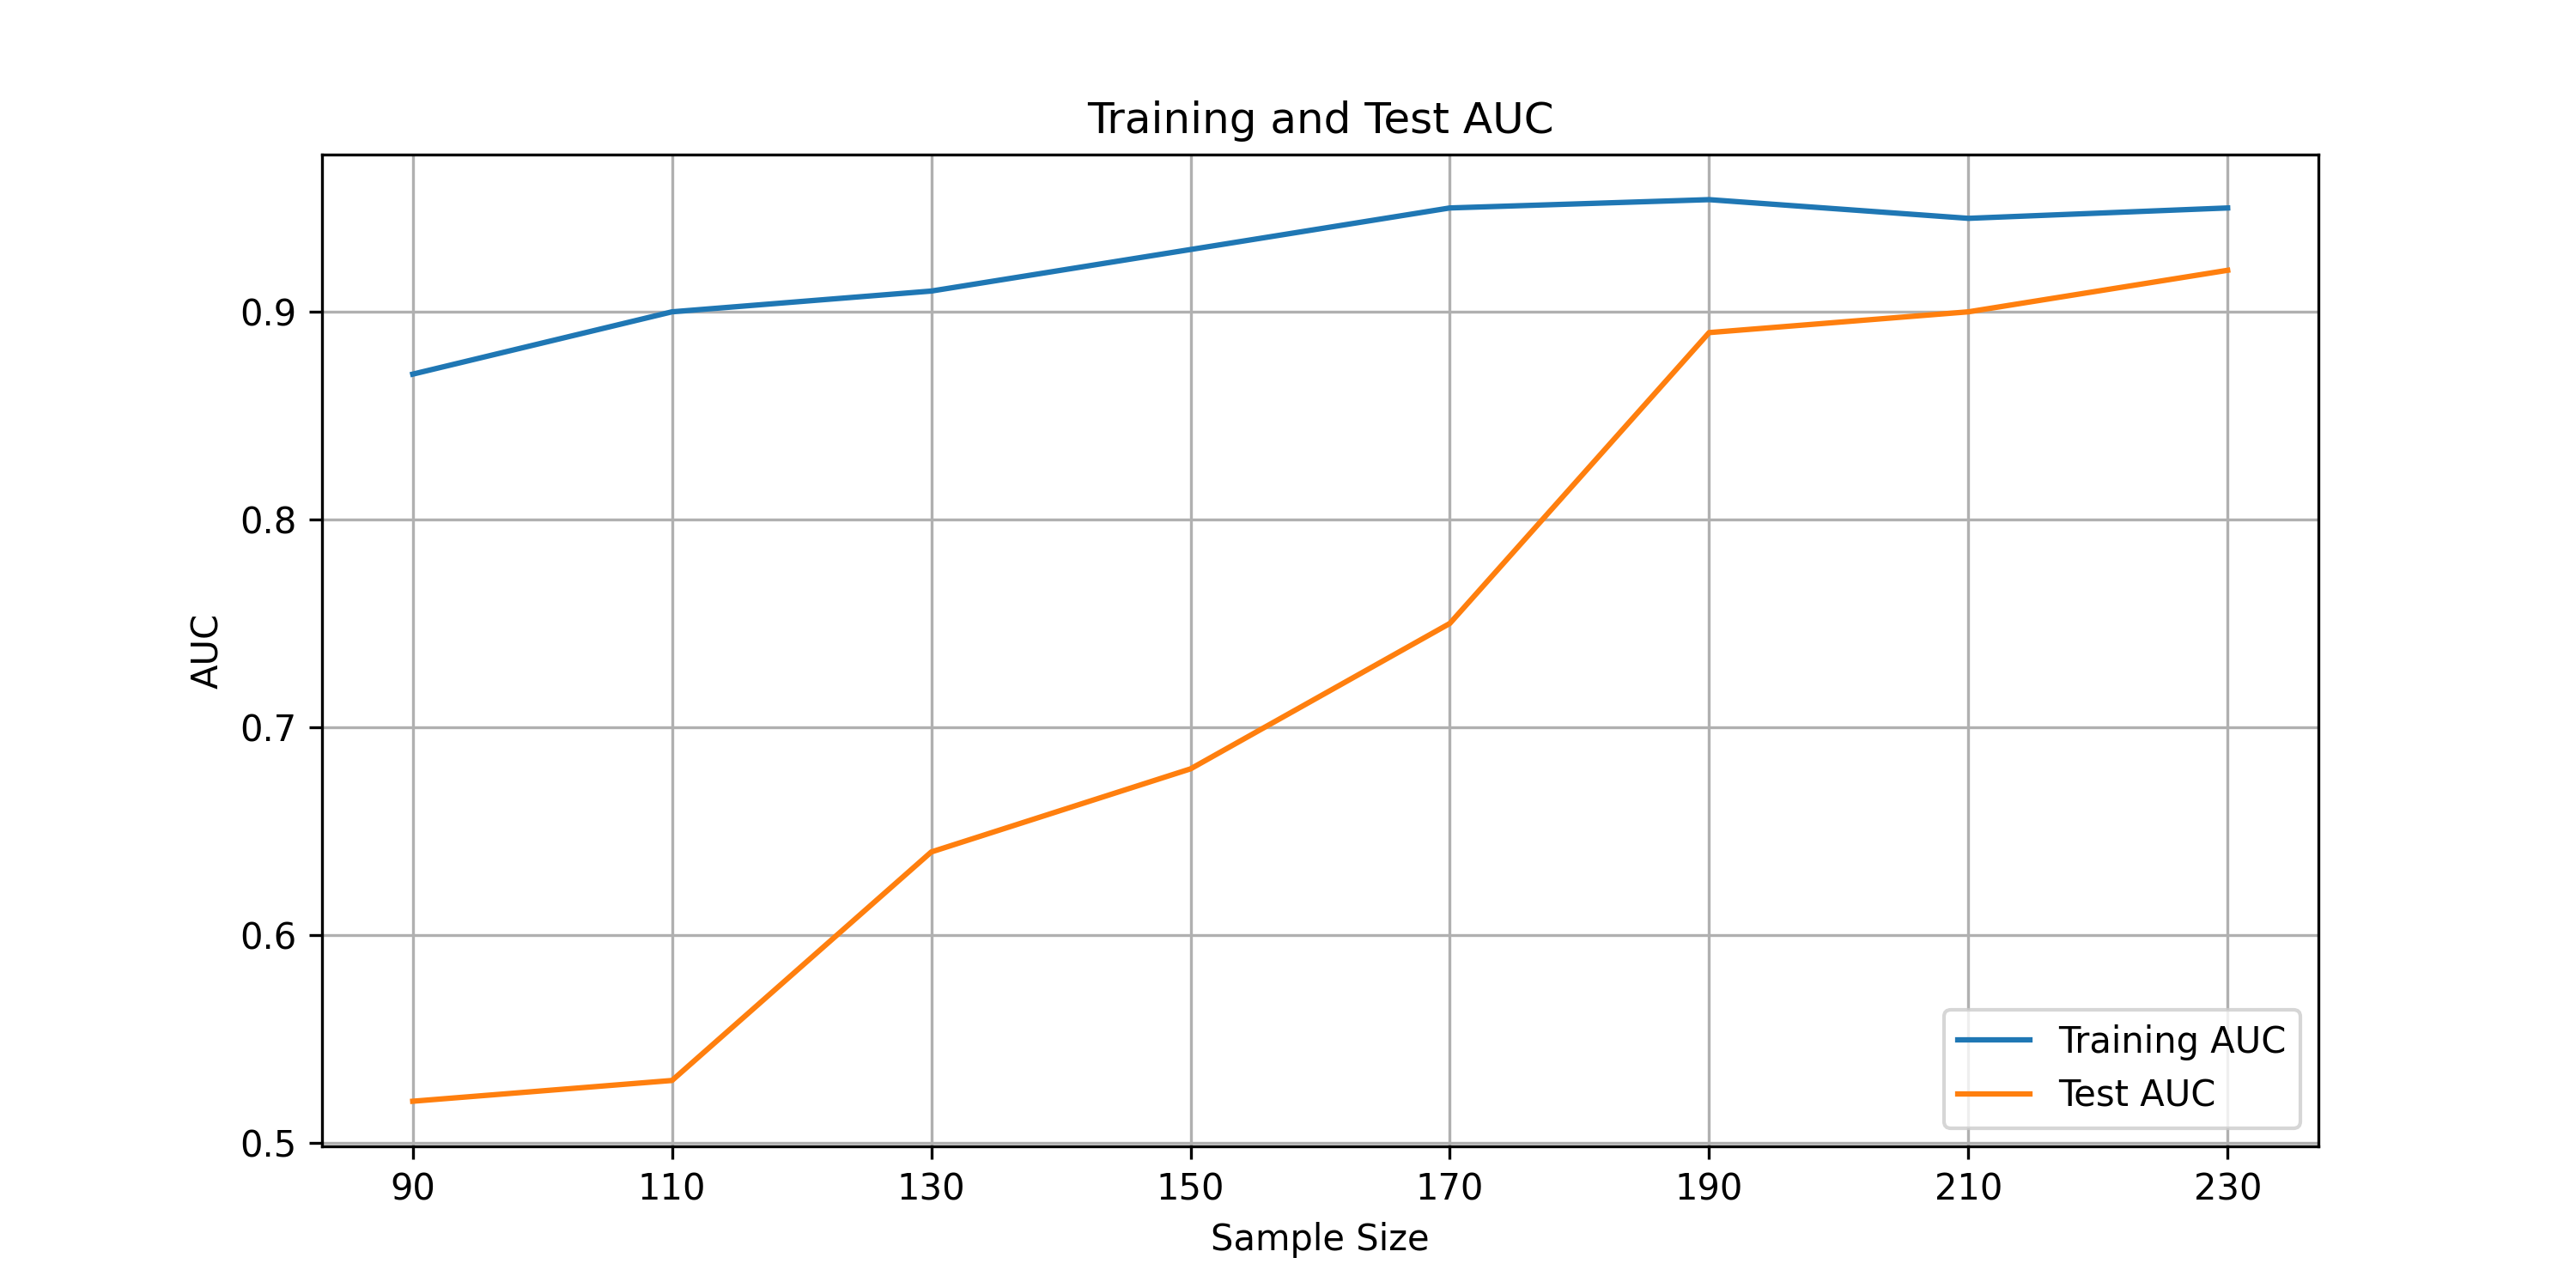


The test AUC rises substantially from ~0.52 at n=90 to ~0.89 at n=190, and begins to plateau beyond n=190–210 (test AUC stabilizing at approximately 0.90–0.92). Crucially, the training AUC remains relatively stable throughout (0.87–0.96), and the train-test AUC gap narrows progressively with increasing sample size, converging to approximately 0.03–0.04 at our full cohort size.

Table S1 Parameters from CT scans in training, validation and testing sets

| Sets | Manufacture | Field of view | Image matrix | Tube voltage | Tube current | Slice thickness |
| --- | --- | --- | --- | --- | --- | --- |
| Training and validation | GE-Discovery CT750 HD | 30-50cm | 512×512 | 120KV | 206mA | 5mm |
| Siemens-SOMATOM Force | 30-50cm | 512×512 | 120KV | 210mA | 5mm |
| test | Philips-Brilliance iCT | 30-50cm | 512×512 | 120KV | 274 mA | 5mm |

Table S2 Performance of all 14 machine learning algorithms incorporating clinical features in the three cohorts. ExtraTree was the model with the best prediction performance

| Dataset | Model | ACC | AUC(95% CI) | Sensitivity | Specificity | NPV | PPV | F1 |
| --- | --- | --- | --- | --- | --- | --- | --- | --- |
| train | LR | 0.795 | 0.843 (0.803,0.883) | 0.858 | 0.750 | 0.881 | 0.711 | 0.778 |
| validation | LR | 0.667 | 0.652 (0.549,0.750) | 0.533 | 0.762 | 0.696 | 0.615 | 0.571 |
| test | LR | 0.853 | 0.890 (0.803,0.959) | 0.902 | 0.794 | 0.871 | 0.841 | 0.871 |
| train | NB | 0.819 | 0.833 (0.793,0.871) | 0.783 | 0.845 | 0.845 | 0.783 | 0.783 |
| validation | NB | 0.722 | 0.696 (0.596,0.784) | 0.600 | 0.810 | 0.739 | 0.692 | 0.643 |
| test | NB | 0.680 | 0.715 (0.635,0.795) | 0.463 | 0.941 | 0.593 | 0.905 | 0.613 |
| train | linear_SVM | 0.764 | 0.821 (0.783,0.863) | 0.764 | 0.764 | 0.819 | 0.698 | 0.730 |
| validation | linear_SVM | 0.667 | 0.648 (0.542,0.748) | 0.533 | 0.762 | 0.696 | 0.615 | 0.571 |
| test | linear_SVM | 0.853 | 0.881 (0.790,0.955) | 0.902 | 0.794 | 0.871 | 0.841 | 0.871 |
| train | poly_SVM | 0.791 | 0.831 (0.784,0.880) | 0.840 | 0.757 | 0.868 | 0.712 | 0.771 |
| validation | poly_SVM | 0.667 | 0.659 (0.562,0.761) | 0.600 | 0.714 | 0.714 | 0.600 | 0.600 |
| test | poly_SVM | 0.800 | 0.832 (0.756,0.924) | 0.976 | 0.588 | 0.952 | 0.741 | 0.842 |
| train | sigmoid_SVM | 0.799 | 0.805 (0.747,0.855) | 0.726 | 0.851 | 0.813 | 0.778 | 0.751 |
| validation | sigmoid_SVM | 0.704 | 0.698 (0.604,0.798) | 0.600 | 0.778 | 0.731 | 0.659 | 0.628 |
| test | sigmoid_SVM | 0.747 | 0.749 (0.660,0.869) | 0.805 | 0.676 | 0.742 | 0.750 | 0.776 |
| train | rbf_SVM | 0.799 | 0.858 (0.817,0.900) | 0.868 | 0.750 | 0.888 | 0.713 | 0.783 |
| validation | rbf_SVM | 0.685 | 0.664 (0.568,0.762) | 0.511 | 0.810 | 0.699 | 0.657 | 0.575 |
| test | rbf_SVM | 0.853 | 0.894 (0.819,0.962) | 0.902 | 0.794 | 0.871 | 0.841 | 0.871 |
| train | DT | 0.764 | 0.740 (0.694,0.791) | 0.594 | 0.885 | 0.753 | 0.788 | 0.677 |
| validation | DT | 0.694 | 0.668 (0.596,0.757) | 0.511 | 0.825 | 0.703 | 0.676 | 0.582 |
| test | DT | 0.587 | 0.622 (0.573,0.683) | 0.244 | 1.000 | 0.523 | 1.000 | 0.392 |
| train | RF | 0.787 | 0.865 (0.831,0.910) | 0.830 | 0.757 | 0.862 | 0.710 | 0.765 |
| validation | RF | 0.694 | 0.694 (0.606,0.797) | 0.556 | 0.794 | 0.714 | 0.658 | 0.602 |
| test | RF | 0.853 | 0.914 (0.864,0.956) | 0.854 | 0.853 | 0.829 | 0.875 | 0.864 |
| train | ExtraTree | 0.783 | 0.877 (0.842,0.911) | 0.821 | 0.757 | 0.855 | 0.707 | 0.760 |
| validation | ExtraTree | 0.713 | 0.721 (0.623,0.818) | 0.756 | 0.683 | 0.796 | 0.630 | 0.687 |
| test | ExtraTree | 0.827 | 0.895 (0.833,0.946) | 0.780 | 0.882 | 0.769 | 0.889 | 0.831 |
| train | XGBoost | 0.583 | 0.328 (0.279,0.378) | 0.000 | 1.000 | 0.583 | 0.000 | 0.000 |
| validation | XGBoost | 0.583 | 0.462 (0.403,0.518) | 0.000 | 1.000 | 0.583 | 0.000 | 0.000 |
| test | XGBoost | 0.453 | 0.441 (0.357,0.511) | 0.000 | 1.000 | 0.453 | 0.000 | 0.000 |
| train | AdaBoost | 0.764 | 0.777 (0.732,0.829) | 0.594 | 0.885 | 0.753 | 0.788 | 0.677 |
| validation | AdaBoost | 0.694 | 0.661 (0.556,0.762) | 0.511 | 0.825 | 0.703 | 0.676 | 0.582 |
| test | AdaBoost | 0.853 | 0.853 (0.765,0.926) | 0.878 | 0.824 | 0.848 | 0.857 | 0.867 |
| train | MLP | 0.630 | 0.513 (0.446,0.595) | 0.566 | 0.676 | 0.685 | 0.556 | 0.561 |
| validation | MLP | 0.602 | 0.424 (0.287,0.536) | 0.244 | 0.857 | 0.614 | 0.550 | 0.338 |
| test | MLP | 0.547 | 0.322 (0.238,0.464) | 0.171 | 1.000 | 0.500 | 1.000 | 0.292 |
| train | GBM | 0.783 | 0.760 (0.712,0.808) | 0.585 | 0.926 | 0.757 | 0.849 | 0.693 |
| validation | GBM | 0.694 | 0.669 (0.592,0.755) | 0.511 | 0.825 | 0.703 | 0.676 | 0.582 |
| test | GBM | 0.587 | 0.612 (0.537,0.692) | 0.244 | 1.000 | 0.523 | 1.000 | 0.392 |
| train | LightGBM | 0.583 | 0.500 (0.500,0.500) | 0.000 | 1.000 | 0.583 | 0.000 | 0.000 |
| validation | LightGBM | 0.583 | 0.500 (0.500,0.500) | 0.000 | 1.000 | 0.583 | 0.000 | 0.000 |
| test | LightGBM | 0.453 | 0.500 (0.500,0.500) | 0.000 | 1.000 | 0.453 | 0.000 | 0.000 |

LR,Logistic Regression;NB,Naive Bayes;linear_SVM,Linear Support Vector Machine;poly_SVM,Polynomial Kernel Support Vector Machine;sigmoid_SVM,Sigmoid Kernel Support Vector Machine;rbf_SVM,Radial Basis Function Kernel Support Vector Machine;DT,Decision Tree;RF,Random Forest;ExtraTree,Extremely Randomized Trees;XGBoost,eXtreme Gradient Boosting;AdaBoost,Adaptive Boosting;MLP,Multi-Layer Perceptron;GBM,Gradient Boosting Machine;LightGBM,Light Gradient Boosting Machine.

Table S3 The 95% CI of accuracy,sensitivity,specificity,NPV,PPV and F1 of the models in the three cohorts

| Models | Cohorts |  | Accuracy | |  | Sensitivity | |  | Specificity | |  | NPV | |  | PPV | |  | F1 | |
| --- | --- | --- | --- | --- | --- | --- | --- | --- | --- | --- | --- | --- | --- | --- | --- | --- | --- | --- | --- |
| Clinical model | train |  | 0.740 | 0.843 |  | 0.764 | 0.892 |  | 0.692 | 0.831 |  | 0.817 | 0.909 |  | 0.655 | 0.692 |  | 0.831 | 0.817 |
|  | validation |  | 0.634 | 0.815 |  | 0.644 | 0.889 |  | 0.556 | 0.818 |  | 0.720 | 0.893 |  | 0.548 | 0.556 |  | 0.818 | 0.720 |
|  | test |  | 0.747 | 0.907 |  | 0.659 | 0.891 |  | 0.794 | 0.971 |  | 0.677 | 0.868 |  | 0.818 | 0.794 |  | 0.971 | 0.677 |
| Arterial phase model | train |  | 0.673 | 0.780 |  | 0.642 | 0.811 |  | 0.662 | 0.797 |  | 0.734 | 0.844 |  | 0.598 | 0.662 |  | 0.797 | 0.734 |
|  | validation |  | 0.639 | 0.806 |  | 0.578 | 0.823 |  | 0.619 | 0.826 |  | 0.700 | 0.863 |  | 0.557 | 0.619 |  | 0.826 | 0.700 |
|  | test |  | 0.600 | 0.800 |  | 0.537 | 0.805 |  | 0.588 | 0.882 |  | 0.548 | 0.771 |  | 0.647 | 0.588 |  | 0.882 | 0.548 |
| Portal venous phase model | train |  | 0.598 | 0.713 |  | 0.575 | 0.755 |  | 0.574 | 0.723 |  | 0.674 | 0.789 |  | 0.516 | 0.574 |  | 0.723 | 0.674 |
|  | validation |  | 0.602 | 0.778 |  | 0.533 | 0.822 |  | 0.587 | 0.810 |  | 0.676 | 0.847 |  | 0.520 | 0.587 |  | 0.810 | 0.676 |
|  | test |  | 0.586 | 0.787 |  | 0.512 | 0.805 |  | 0.559 | 0.853 |  | 0.531 | 0.744 |  | 0.625 | 0.559 |  | 0.853 | 0.531 |
| Delayed phase model | train |  | 0.602 | 0.724 |  | 0.604 | 0.774 |  | 0.561 | 0.723 |  | 0.686 | 0.805 |  | 0.522 | 0.561 |  | 0.723 | 0.686 |
|  | validation |  | 0.537 | 0.722 |  | 0.511 | 0.778 |  | 0.508 | 0.746 |  | 0.623 | 0.804 |  | 0.455 | 0.508 |  | 0.746 | 0.623 |
|  | test |  | 0.533 | 0.747 |  | 0.488 | 0.780 |  | 0.499 | 0.794 |  | 0.486 | 0.714 |  | 0.579 | 0.499 |  | 0.794 | 0.486 |
| Enhancement model | train |  | 0.705 | 0.811 |  | 0.642 | 0.811 |  | 0.709 | 0.838 |  | 0.748 | 0.857 |  | 0.636 | 0.709 |  | 0.838 | 0.748 |
|  | validation |  | 0.713 | 0.861 |  | 0.644 | 0.889 |  | 0.698 | 0.889 |  | 0.761 | 0.917 |  | 0.639 | 0.698 |  | 0.889 | 0.761 |
|  | test |  | 0.667 | 0.853 |  | 0.659 | 0.902 |  | 0.588 | 0.882 |  | 0.625 | 0.862 |  | 0.682 | 0.588 |  | 0.882 | 0.625 |
| Combined model | train |  | 0.839 | 0.913 |  | 0.840 | 0.953 |  | 0.804 | 0.912 |  | 0.882 | 0.962 |  | 0.767 | 0.804 |  | 0.912 | 0.882 |
|  | validation |  | 0.815 | 0.935 |  | 0.756 | 0.956 |  | 0.810 | 0.968 |  | 0.841 | 0.967 |  | 0.760 | 0.810 |  | 0.968 | 0.841 |
|  | test |  | 0.787 | 0.933 |  | 0.732 | 0.951 |  | 0.765 | 0.971 |  | 0.737 | 0.939 |  | 0.810 | 0.765 |  | 0.971 | 0.737 |

NPV,negative predictivevalue;PPV,positive predictive value;Cl,confidence interval.

Table S4 Degrees of freedom (df), chi square values (Chi2), and p values (calculated by the Hosmer-Lemeshow test) in the three cohorts reflect the degree of calibration of the prediction models.The Combined model performed best among all six models

| Group | train | | |  | Validation | | |  | test | | |
| --- | --- | --- | --- | --- | --- | --- | --- | --- | --- | --- | --- |
| df | Chi2 | p-value |  | df | Chi2 | p-value |  | df | Chi2 | p-value |
| Clinical model | 3 | 308.363 | 0.000 |  | 3 | 469.872 | 0.000 |  | 3 | 96.048 | 0.000 |
| Arterial phase model | 78 | 73.582 | 0.621 |  | 78 | 69.367 | 0.747 |  | 48 | 47.788 | 0.481 |
| Portal venous phase model | 78 | 100.508 | 0.044 |  | 78 | 80.559 | 0.399 |  | 48 | 69.256 | 0.024 |
| Delayed phase model | 78 | 119.330 | 0.002 |  | 78 | 108.789 | 0.012 |  | 48 | 64.757 | 0.054 |
| Enhancement model | 78 | 81.390 | 0.374 |  | 78 | 64.247 | 0.868 |  | 48 | 27.973 | 0.991 |
| Combined model | 78 | 78.641 | 0.458 |  | 78 | 46.855 | 0.998 |  | 48 | 35.747 | 0.904 |
